# Supplementary material
Source: publisher site journal article supplement (https://www.spandidos-publications.com/1923/downloadSupplementary)
Supplement: Supplementary file 1 [file downloadSupplementary]

Figure S1. Initial ECG recorded during CA. A total of 27 patients experienced CA. The initial rhythm of 21 patients (77.8%) was a shockable rhythm (VF or pulseless VT). The initial rhythm of 5 patients (18.5%) was a non-shockable rhythm, including 3 cases of pulseless electrical activity (11.1%) and 2 cases of asystole (7.4%). The initial rhythm of 1 patient (3.7%) was unknown. ECG, electrocardiogram; CA, cardiac arrest; VF, ventricular fibrillation; VT, ventricular tachycardia.

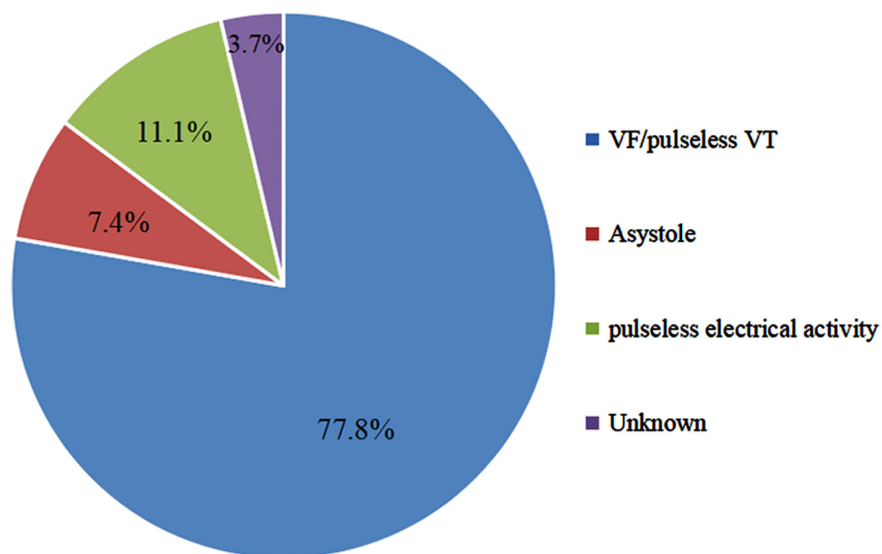

Table SI. Comparison of general data.

| Characteristics            | All (n=274) | FM 77 (28.1) | Non-FM 197 (71.9) | $\chi^2$ or t | P-value |
|----------------------------|-------------|--------------|-------------------|---------------|---------|
| Age (years)                | 36.97±16.22 | 38.43±14.98  | 36.4±16.68        | 0.932         | 0.352   |
| Gender                     |             |              |                   | 0.886         | 0.347   |
| Male                       | 186         | 49 (63.3)    | 137 (69.5)        |               |         |
| Female                     | 88          | 28 (36.4)    | 60 (30.5)         |               |         |
| Smoking history            |             |              |                   | 0.729         | 0.393   |
| Yes                        | 55          | 18 (23.4)    | 37 (18.8)         |               |         |
| No                         | 219         | 59 (76.6)    | 160 (81.2)        |               |         |
| Drinking history           |             |              |                   | 2.415         | 0.120   |
| With                       | 39          | 15 (19.5)    | 24 (12.2)         |               |         |
| Without                    | 235         | 62 (80.5)    | 173 (87.8)        |               |         |
| Hypertension               |             |              |                   | 1.668         | 0.197   |
| Yes                        | 38          | 14 (18.2)    | 24 (12.2)         |               |         |
| No                         | 236         | 63 (81.8)    | 173 (87.8)        |               |         |
| Diabetes                   |             |              |                   | 0.029         | 0.864   |
| Yes                        | 6           | 1 (1.3)      | 5 (2.5)           |               |         |
| No                         | 268         | 76 (98.7)    | 192 (97.5)        |               |         |
| FM, fulminant myocarditis. |             |              |                   |               |         |

Table SII. Comparison of the incidence of CA in AVB patients.

| Variable               | CA        | Non-CA     | $\chi^2$ | P-value |
|------------------------|-----------|------------|----------|---------|
| Group A                |           |            | 11.393   | 0.001   |
| AVB (n=38)             | 10 (26.3) | 28 (73.7)  |          |         |
| Non-AVB (n=236)        | 17 (7.2)  | 219 (92.8) |          |         |
| Group B                |           |            | 11.793   | 0.001   |
| High-degree AVB (n=32) | 9 (28.1)  | 23 (71.9)  |          |         |
| Non-AVB (n=236)        | 17 (7.2)  | 219 (92.8) |          |         |

CA, cardiac arrest; AVB, atrioventricular block.

Table SIII. Time distribution of cardiac symptoms prior to admission for ST elevation on admission.

| Variable                                     | <1 day | 1 day | 2 days | 3 days | 4 days | 5 days | 6 days | 7 days |
|----------------------------------------------|--------|-------|--------|--------|--------|--------|--------|--------|
| ST elevation without T-wave inversion (n=87) | 23     | 29    | 21     | 10     | 3      | 0      | 1      | 0      |
| ST elevation with T-wave inversion (n=25)    | 0      | 5     | 7      | 4      | 3      | 2      | 1      | 3      |

The median duration of ST elevation without T-wave inversion was 1.5 days, and the median duration of ST elevation with T-wave inversion was 4.0 days.
